# Supplementary material for: Improved Therapeutic Efficacy of CBD with Good Tolerance in the Treatment of Breast Cancer through Nanoencapsulation and in Combination with 20(S)-Protopanaxadiol (PPD)
Source: MDPI journal article supplement (doi:10.3390/pharmaceutics14081533), 2022-07-22
Supplement: s1 [file s1]

**Table S1.** Formulation and particle size of various CBD liposomes and CBD-PPD liposomes.

|                                                     | Formulation              | Size(nm)         | PDI               |
|-----------------------------------------------------|--------------------------|------------------|-------------------|
| CBD liposomes                                       | SPC:chol:CBD=4:1:1       | $192.6 \pm 2.84$ | $0.209 \pm 0.005$ |
| CBD-PPD liposomes (CP-liposomes)                    | SPC:PPD:CBD =4:1:1       | $138.8 \pm 1.76$ | $0.245 \pm 0.006$ |
| PPD liposomes                                       | SPC:PPD=4:1              | $113.5 \pm 2.39$ | $0.323 \pm 0.026$ |
| maltose modified CBD liposomes (GMC-liposomes)      | SPC:chol:CBD:Mal=4:1:1:1 | $145.0 \pm 2.97$ | $0.270 \pm 0.010$ |
| maltose modified CBD-PPD liposomes (GMCP-liposomes) | SPC:PPD:CBD:Mal =4:1:1:1 | $179.3 \pm 2.29$ | $0.267 \pm 0.018$ |

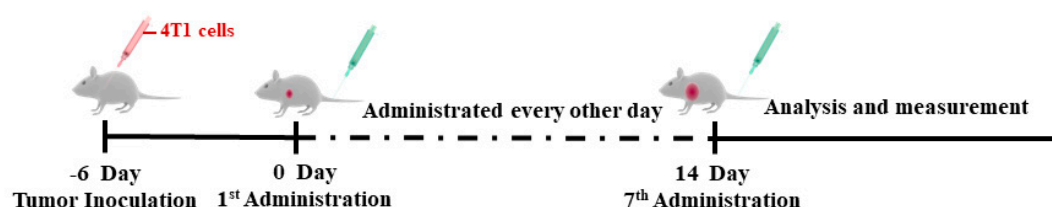

**Figure S1.** Schematic illustration of treatment of chemotherapy to a 4T1 tumor-bearing mice.

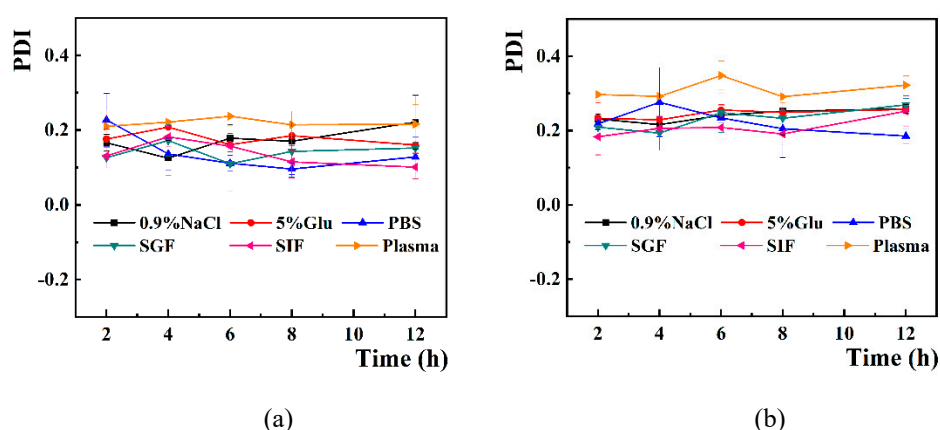

**Figure S2:** The PDI value of CP-liposome (a) and GMCP-liposome (b) in various physical media at 37°C.

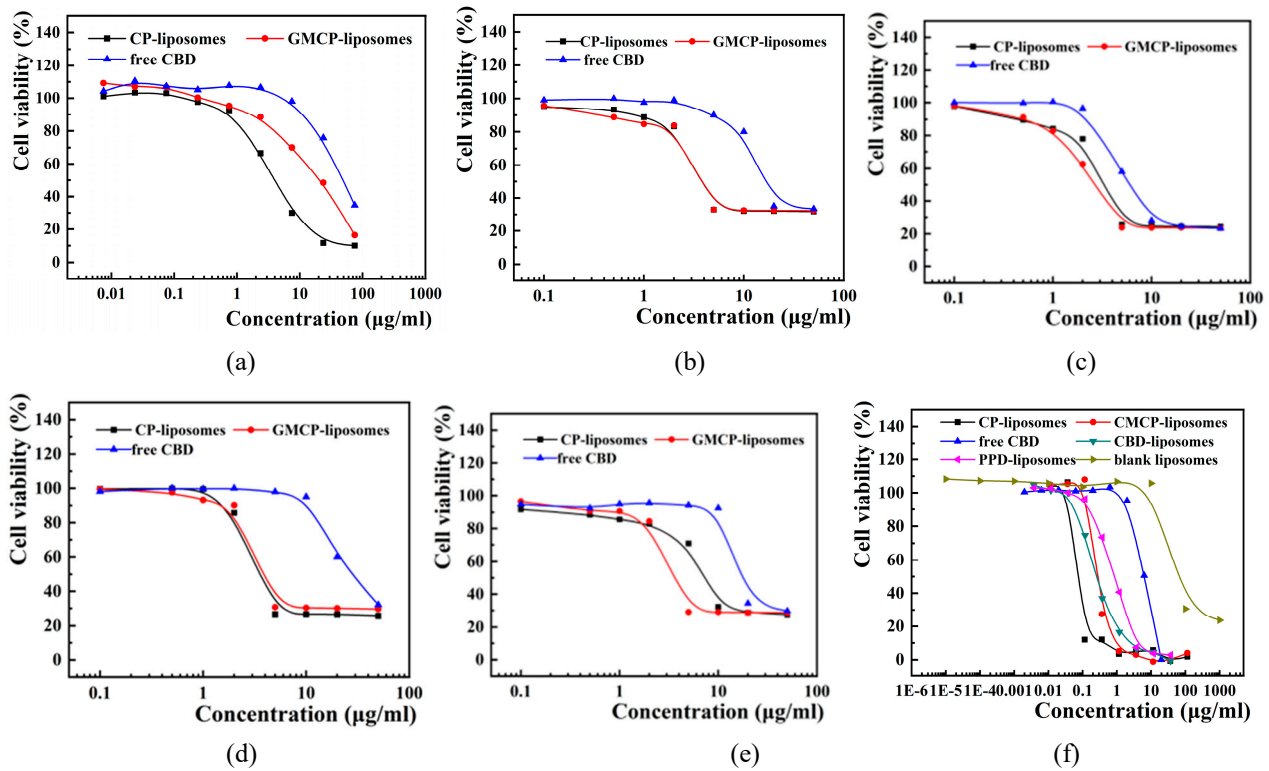

**Figure S3:** The tumor cell growth inhibition curve of free CBD, CP-liposomes, GMCP-liposomes against MCF-7 cell line (a), A549 cell line (b), C6 cell line (c), HeLa cell line (d) and HepG2 cell line (e). The tumor cell growth inhibition curve of free CBD, CP-liposomes, GMCP-liposomes, PPD liposomes and CBD-liposomes against 4T1 cell line (f).
